# Supplementary material
Source: PubMed Central journal article supplement (PMC3835727)

## SUPPLEMENTAL MATERIAL Canepa M et al.

Supplemental Table S1. Pearson correlations between age, adiposity and LV diastolic function by gender.

|                    | Women<br>(n=462) | Men<br>(n=381) |
|--------------------|------------------|----------------|
| <b>Age</b>         |                  |                |
| <b>TBF</b>         | -0.01            | -0.03          |
| <b>VAT</b>         | 0.39*            | 0.31*          |
| <b>SAT</b>         | 0.04             | -0.09          |
| <b>E/A ratio</b>   |                  |                |
| <b>Age</b>         | -0.51*           | -0.60*         |
| <b>TBF</b> §       | -0.18*           | -0.18†         |
| <b>VAT</b> §       | -0.14†           | -0.22*         |
| <b>SAT</b> §       | -0.14†           | -0.13†         |
| <b>Em</b>          |                  |                |
| <b>Age</b>         | -0.67*           | -0.66*         |
| <b>TBF</b> §       | -0.20*           | -0.20*         |
| <b>VAT</b> §       | -0.22*           | -0.20*         |
| <b>SAT</b> §       | -0.15†           | -0.14†         |
| <b>E/Em ratio</b>  |                  |                |
| <b>Age</b>         | 0.41*            | 0.35*          |
| <b>TBF</b> §       | 0.03             | 0.11‡          |
| <b>VAT</b> §       | 0.04             | 0.10‡          |
| <b>SAT</b> §       | 0.04             | 0.13†          |
| <b>Em/Am ratio</b> |                  |                |
| <b>Age</b>         | -0.54*           | -0.58*         |
| <b>TBF</b> §       | -0.21*           | -0.25*         |
| <b>VAT</b> §       | -0.19*           | -0.30*         |
| <b>SAT</b> §       | -0.16†           | -0.19†         |

\*P<.0001, † P<.001, ‡ P<.005. § represent age-adjusted Pearson correlation coefficients. See Table 1 for abbreviations.

**Supplemental Table S2. Age- and gender-adjusted Pearson correlations between potential mediators, adiposity and LV diastolic function.**

|                      | <b>TBF</b> | <b>VAT</b> | <b>SAT</b>         | <b>E/A ratio</b>  | <b>Em</b>         | <b>Em/Am ratio</b> |
|----------------------|------------|------------|--------------------|-------------------|-------------------|--------------------|
| <b>Triglycerides</b> | 0.30*      | 0.47*      | 0.25*              | -0.16*            | -0.20*            | -0.17*             |
| <b>SHBG</b>          | -0.31*     | -0.39*     | -0.25 <sup>†</sup> | 0.17*             | 0.15 <sup>†</sup> | 0.19*              |
| <b>Adiponectin</b>   | -0.21*     | -0.26*     | -0.19 <sup>†</sup> | 0.07 <sup>‡</sup> | 0.18*             | 0.12 <sup>†</sup>  |
| <b>Leptin</b>        | 0.71*      | 0.50*      | 0.62*              | -0.15*            | -0.15*            | -0.15*             |

\*P<.0001, <sup>†</sup> P<.001, <sup>‡</sup> P<.05. See Table 1 for abbreviations

**Supplemental Table S3. Multivariate analysis showing the mediators of the relationship between visceral adiposity and LV diastolic function.**

|                              | E/A ratio |       |          | Em      |       |          | Em/Am ratio |       |          |
|------------------------------|-----------|-------|----------|---------|-------|----------|-------------|-------|----------|
|                              | $\beta$   | SE    | <i>P</i> | $\beta$ | SE    | <i>P</i> | $\beta$     | SE    | <i>P</i> |
| <b>From previous Model 2</b> |           |       |          |         |       |          |             |       |          |
| VAT                          | -0.035    | 0.010 | <.001    | -0.245  | 0.066 | <.001    | -0.053      | 0.011 | <.0001   |
| <b>Model 2a</b>              |           |       |          |         |       |          |             |       |          |
| VAT                          | -0.028    | 0.011 | 0.01     | -0.178  | 0.072 | 0.01     | -0.048      | 0.012 | <.0001   |
| TG                           | -0.037    | 0.021 | 0.08     | -0.322  | 0.143 | 0.02     | -0.028      | 0.024 | 0.24     |
| <b>Model 2b</b>              |           |       |          |         |       |          |             |       |          |
| VAT                          | -0.021    | 0.010 | 0.04     | -0.203  | 0.071 | 0.004    | -0.041      | 0.012 | <.001    |
| SHBG                         | 0.063     | 0.019 | 0.001    | 0.201   | 0.130 | 0.12     | 0.055       | 0.022 | 0.01     |
| <b>Model 2c</b>              |           |       |          |         |       |          |             |       |          |
| VAT                          | -0.034    | 0.010 | <.001    | -0.213  | 0.069 | 0.002    | -0.050      | 0.011 | <.0001   |
| ADIPONECTIN                  | -0.08     | 0.012 | 0.51     | 0.131   | 0.082 | 0.11     | 0.013       | 0.013 | 0.33     |
| <b>Model 2d</b>              |           |       |          |         |       |          |             |       |          |
| VAT                          | -0.033    | 0.011 | 0.003    | -0.250  | 0.075 | <.001    | -0.056      | 0.012 | <.0001   |
| LEPTIN                       | -0.005    | 0.011 | 0.67     | 0.011   | 0.075 | 0.89     | 0.005       | 0.012 | 0.70     |
| <b>Model 2e</b>              |           |       |          |         |       |          |             |       |          |
| VAT                          | -0.019    | 0.011 | 0.10     | -0.147  | 0.075 | 0.05     | -0.038      | 0.013 | 0.003    |
| TG                           | -0.017    | 0.022 | 0.44     | -0.317  | 0.147 | 0.03     | -0.018      | 0.025 | 0.47     |
| SHBG                         | 0.061     | 0.020 | 0.002    | 0.147   | 0.132 | 0.27     | 0.051       | 0.022 | 0.02     |
| <b>Model 2f</b>              |           |       |          |         |       |          |             |       |          |
| VAT                          | -0.033    | 0.011 | 0.004    | -0.218  | 0.078 | 0.005    | -0.052      | 0.013 | <.0001   |
| ADIPONECTIN                  | -0.008    | 0.012 | 0.50     | 0.131   | 0.082 | 0.11     | 0.013       | 0.013 | 0.32     |
| LEPTIN                       | -0.003    | 0.011 | 0.77     | 0.008   | 0.076 | 0.91     | 0.004       | 0.013 | 0.76     |

Models were adjusted for age, race, gender, smoking, diabetes, hypercholesterolemia, systolic blood pressure, antihypertensive medications, physical activity, heart rate and LV mass index. Variance inflation factor was < 2 in all models. See Table 1 for abbreviations.

**Supplemental Figure S1.**

Mediators are conceptualized as being within the causal pathway of the predictor and the outcome of interest (**A & B** above: visceral adiposity affects triglycerides, SHBG, adiponectin and leptin and they affect diastolic function). If one ignores the mediators (in this example, triglycerides, SHBG, adiponectin and leptin), one will observe a relationship between the predictor, visceral adiposity, and the outcome variable, diastolic function (**C**). Adjusting for mediators results in an attenuation or elimination of the relationship between the predictor and the outcome variable (**C\***). Although such findings lend support to a hypothesis, the findings do not confirm mediation, either partial or complete.

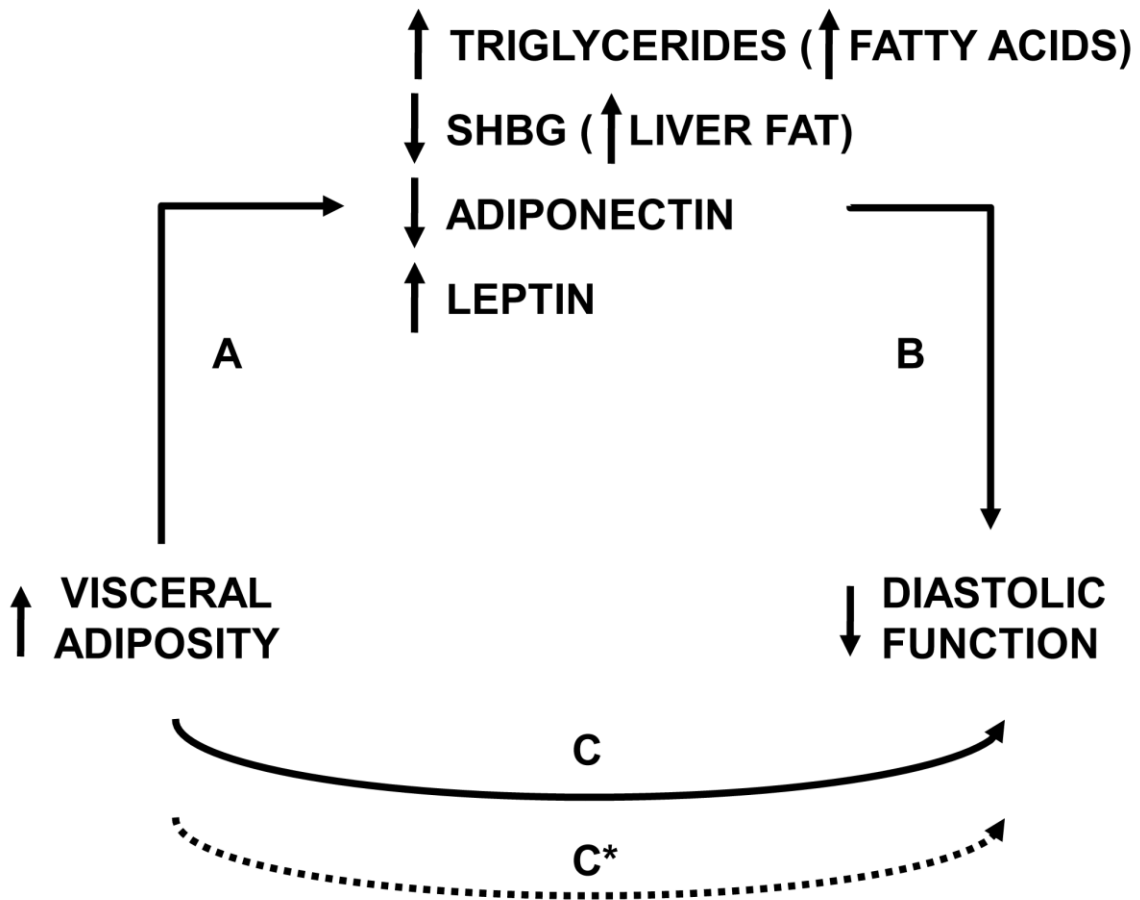

Supplement: NIHMS501079-supplement-01.pdf [file NIHMS501079-supplement-01.pdf]
